# Supplementary material
Source: publisher site journal article supplement (https://www.dovepress.com/article/253152)

**Figure S1 The relationship among of CircNHSL1, miR-149-5p, and YWHAZ in GC tissues.**(A and B) The expression correlation of circNHSL1 with miR-149-5p and YWHAZ in GC tissues analyzed by Pearson correlation analysis. (C) Pearson correlation analysis was applied to evaluate the expression association between YWHAZ and miR-149-5p in GC tissues.


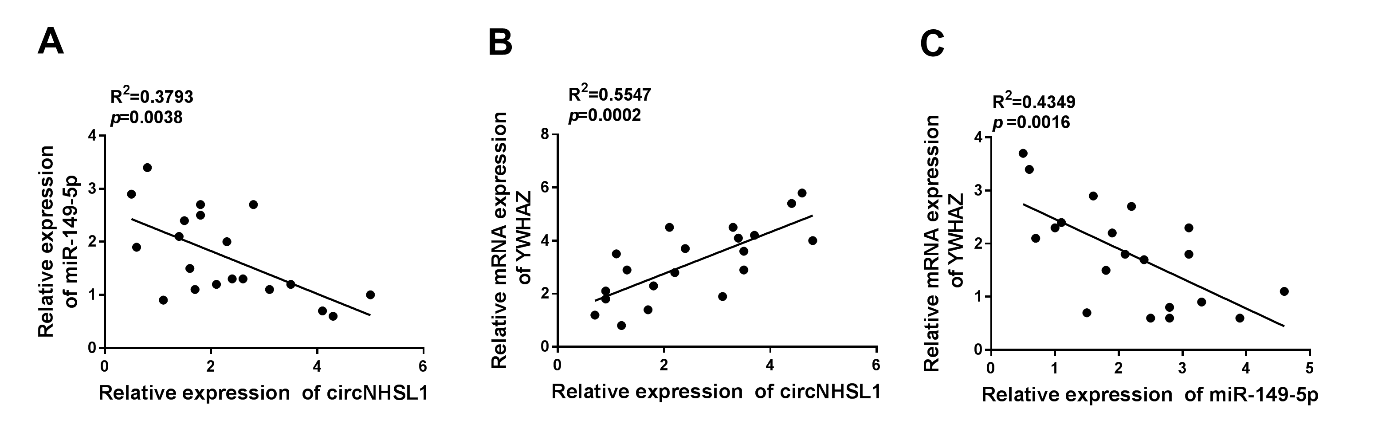


**Figure S2** TCGA database was applied to detect the expression of YWHAZ in STAD. (A) Expression of YWHAZ in STAD based on Sample types. (B) Expression of YWHAZ in STAD based on individual cancer stages.


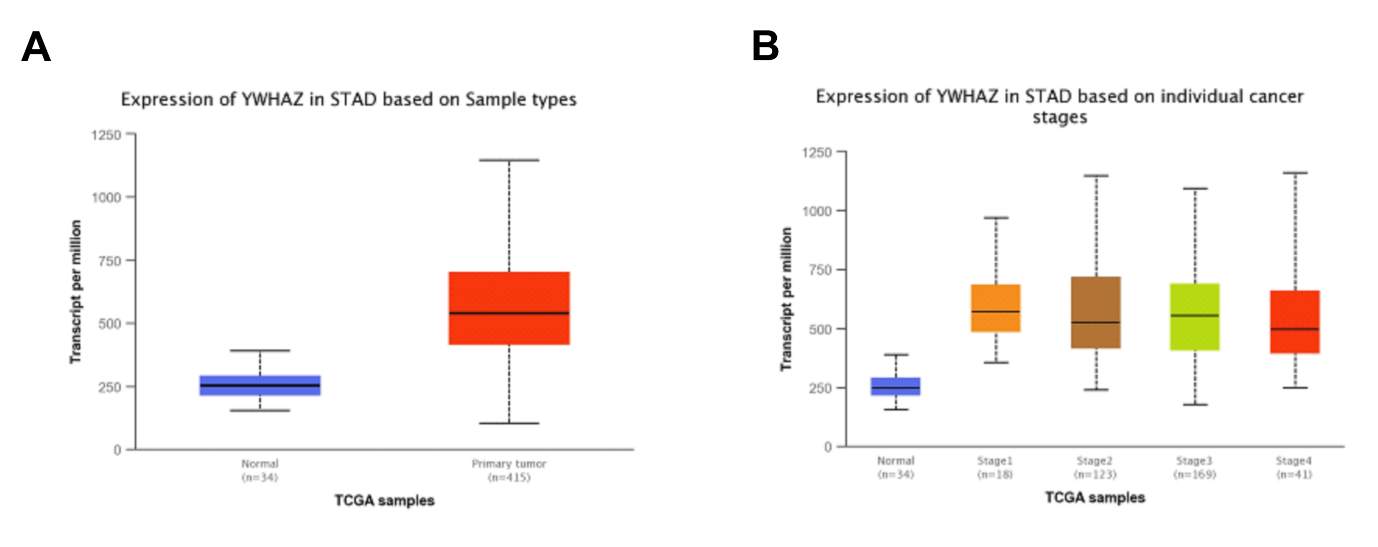

Supplement: Supplementary file 1 [file get_supplementary_file.php]
